# Supplementary material
Source: PubMed Central journal article supplement (PMC5840019)
Supplement: NIHMS936439-supplement-1.pdf [file NIHMS936439-supplement-1.pdf]

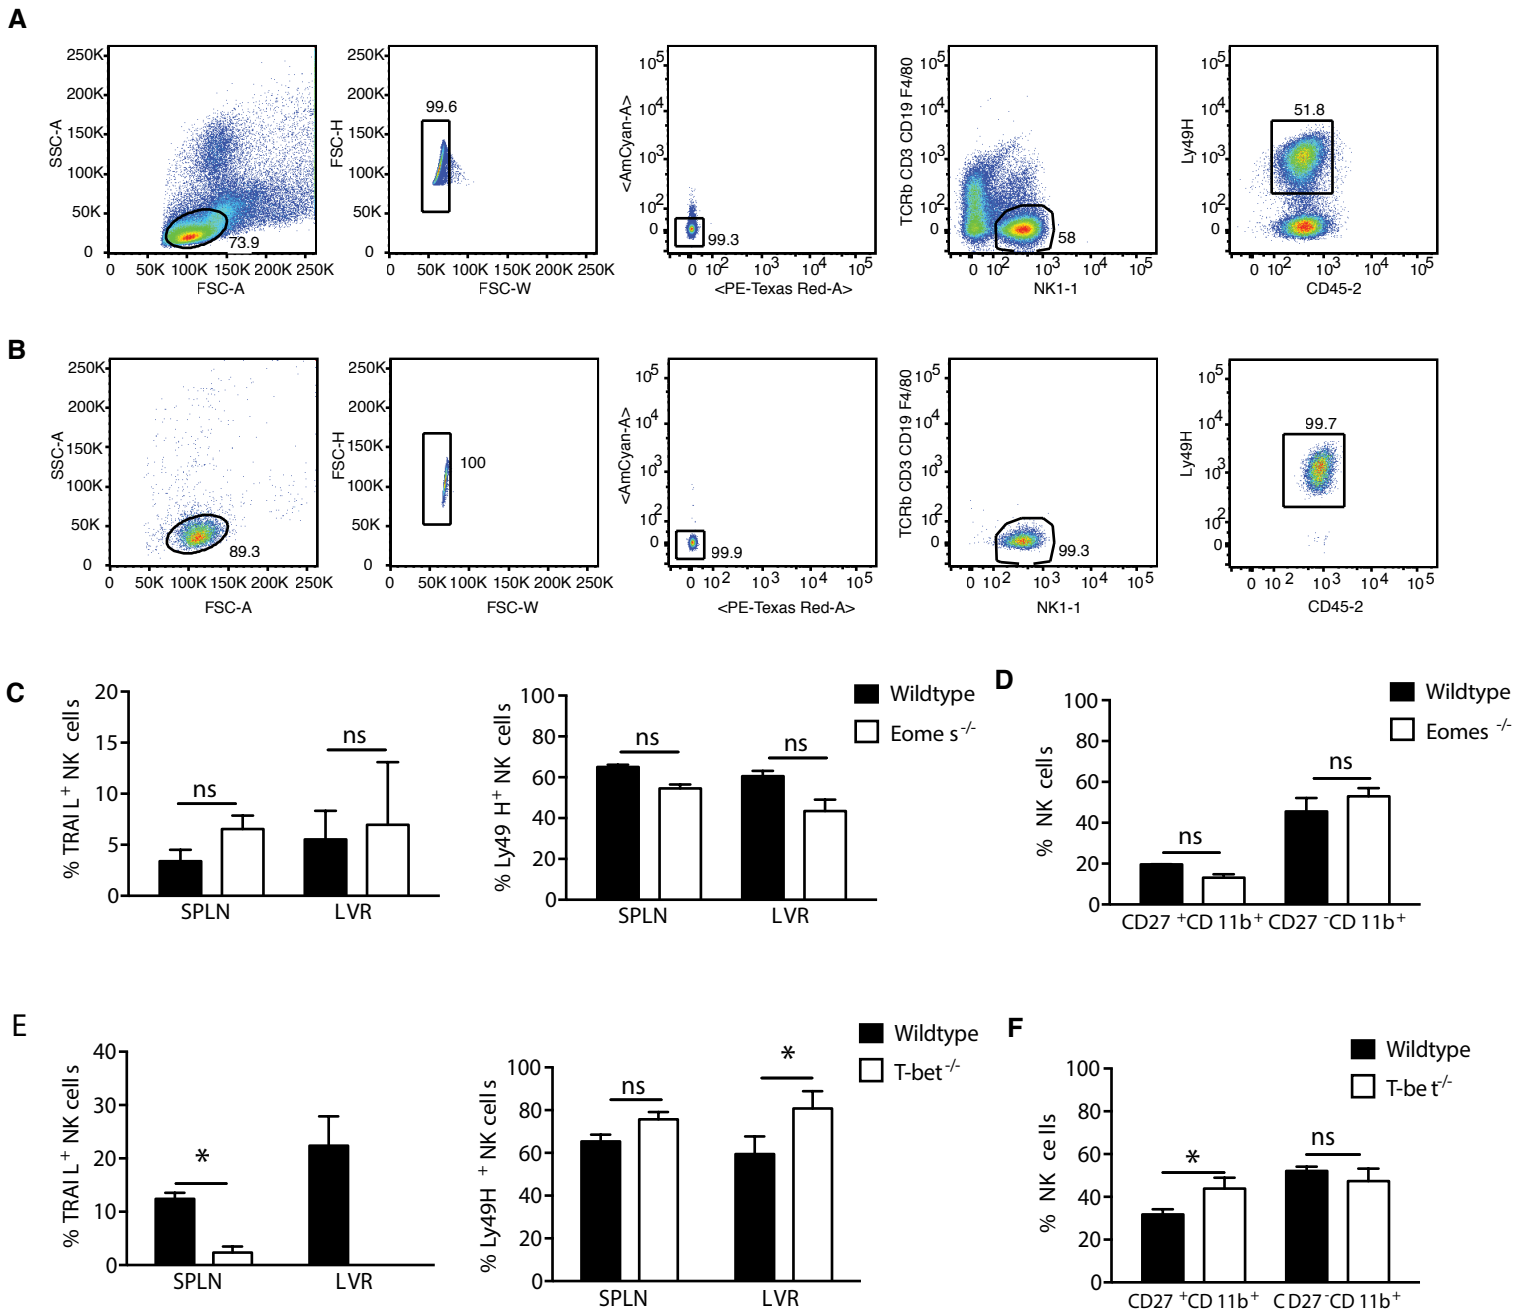

Supplementary Figure 1. Phenotypic changes secondary to deletion of Eomes or T-bet in both normal and lymphopenic mice. WT (CD45.1) and ( A & B) Eomes<sup>fl/fl</sup> UbCre<sup>+</sup> (CD45.2) or ( C & D) T-bet<sup>fl/fl</sup> UbCre<sup>+</sup> (CD45.2) NK cells were co-transferred into WT (CD45.1x2) mice and treated with tamoxifen or oil at day 0 PT. Assessment of phenotypic markers nine days post transfer for the spleen and liver ( A & C) or only spleen ( B & D) are shown. Data are representative of two experiments with at least 3 mice in each condition. \*  $p < 0.05$  and ns, not significant, paired Student t-test.

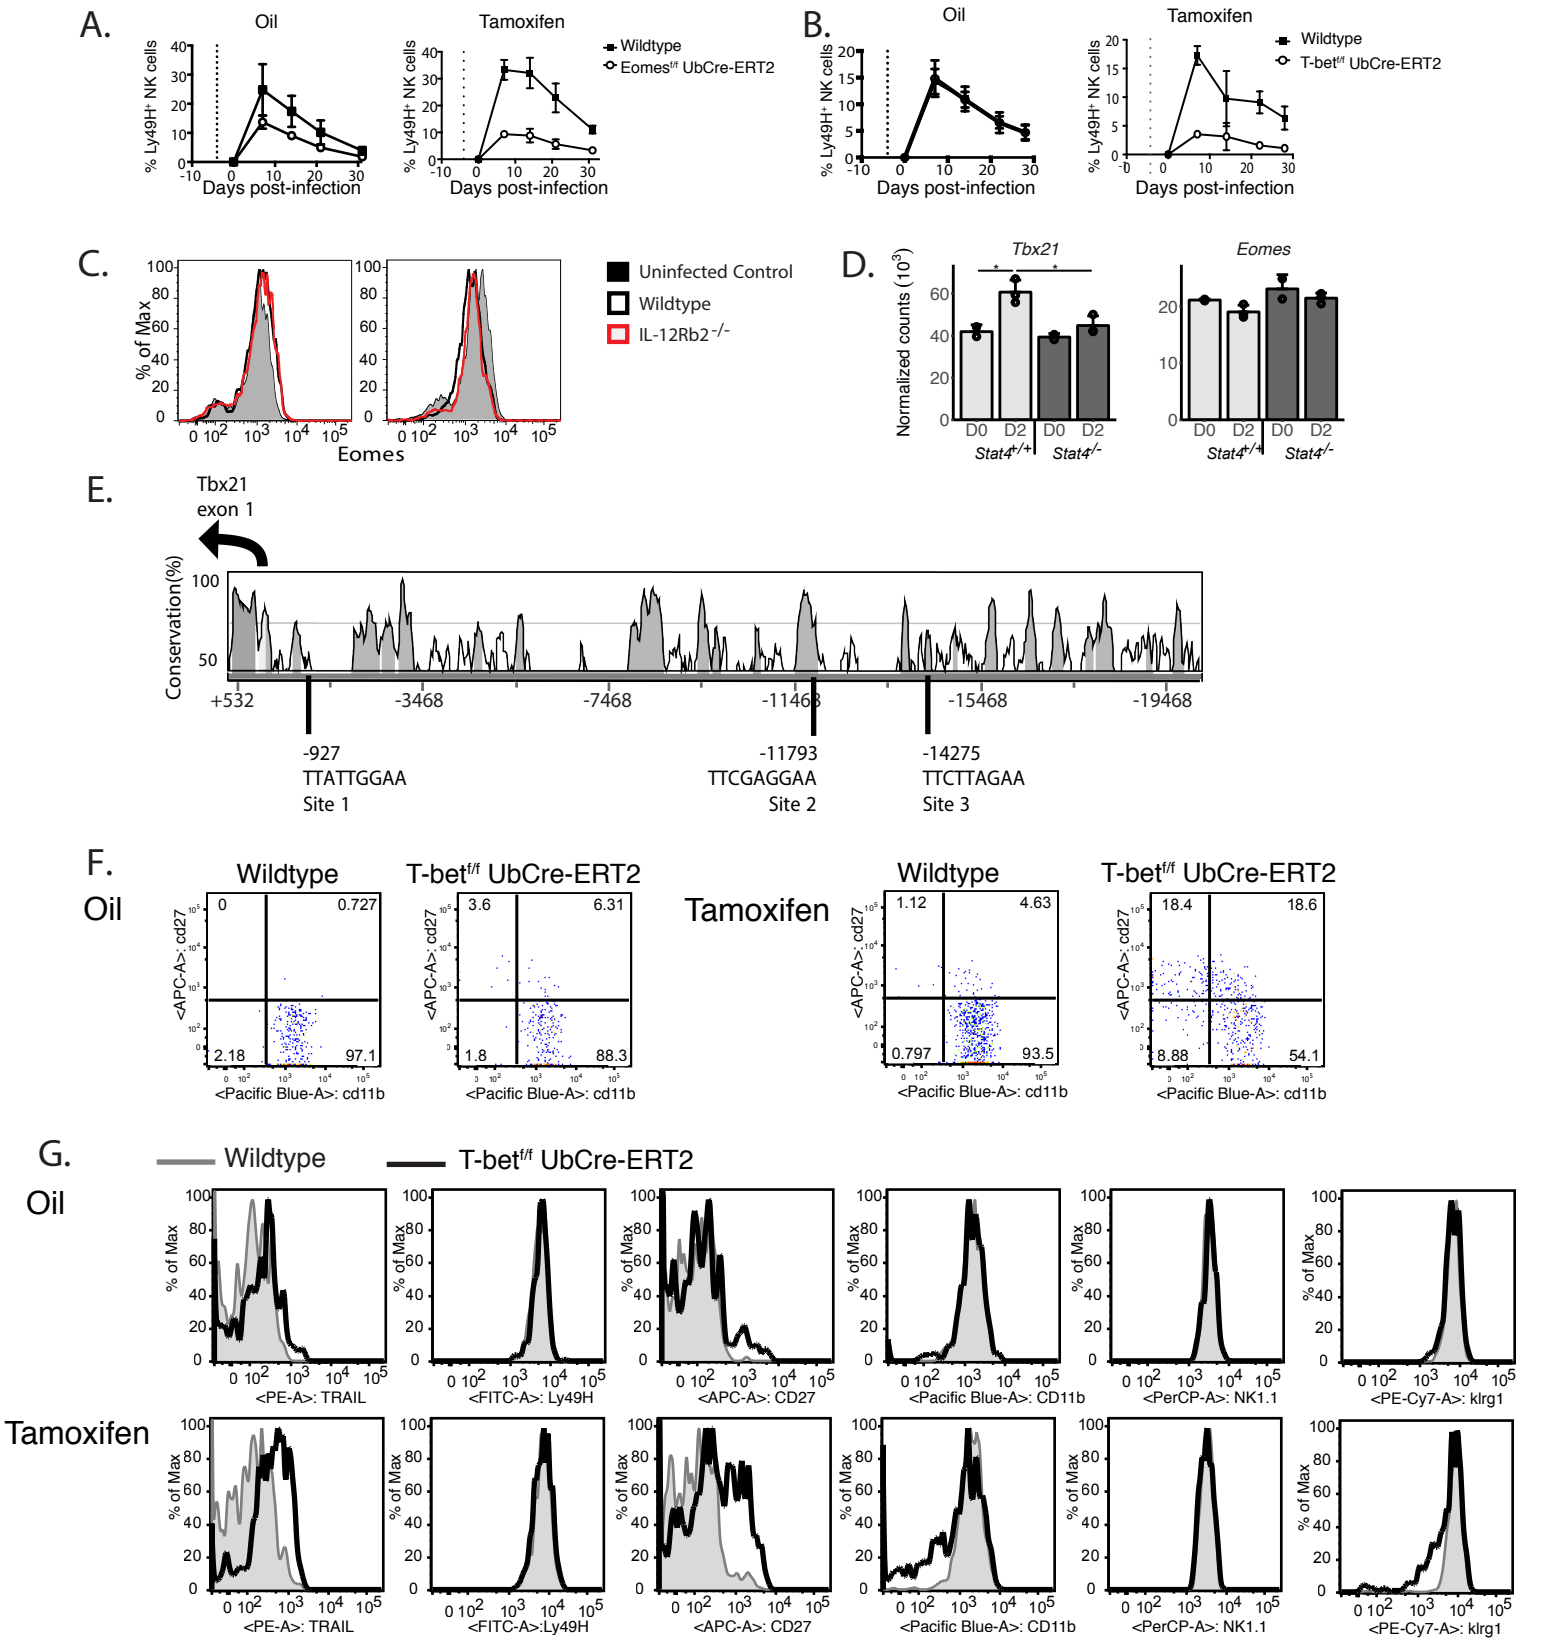

Supplementary Figure 2. Oil treated floxed NK cells expand comparably to WT counterparts in response to MCMV infection. WT (CD45.1) and *Eomes*<sup>fl</sup> UbCre<sup>+</sup> (CD45.2, A) or *T-bet*<sup>fl</sup> UbCre<sup>+</sup> (CD45.2, B) NK cells were co-transferred into *Ly49h*<sup>-/-</sup> mice. Mice were treated with oil or tamoxifen at day -4, -3, and -1 PI and infected with MCMV at D0 PI. Percentages of each population in blood are shown for the indicated time points. (C) Expression of *Eomes* in WT:IL-12rb2<sup>-/-</sup> bone marrow chimeric mice at day 2 following infection with MCMV. (D) Normalized counts of *Tbx21* and *Eomes* from RNA-Seq of NK cells from WT:STAT4<sup>-/-</sup> bone marrow chimeric mice following infection with MCMV. (E) Vista browser image of mouse *Tbx21* promoter and enhancer regions (CNS shown in gray shading), plus three predicted STAT4 binding sites. (F-G) WT (CD45.1) and *T-bet*<sup>fl</sup> UbCre<sup>+</sup> NK cells were co-transferred into *Rag2*<sup>-/-</sup>IL2rg<sup>-/-</sup> mice, which were infected with MCMV and treated with tamoxifen (or oil alone) at 2 weeks PI. Assessment of phenotypic markers in spleen 7 weeks PI (5 weeks post-tamoxifen).
